# Supplementary material
Source: PubMed Central journal article supplement (PMC2586181)
Supplement: NIHMS78925-supplement-S1.pdf [file NIHMS78925-supplement-S1.pdf]

*P.rettgeri* |AAM08003.1| -----  
*V.cholerae* MO10 |EAZ47260.1| -----  
*V.cholerae* |ABA87024.1| -----  
*Shewanella* W3-18-1 |YP\_962502.1| -----  
*Y.p.orientalis* IP275 |ZP\_01175343.1| -----  
*X.c.vesicatoria* 85-10 |YP\_364087.1| -----  
*Acidovorax* JS42 |ZP\_01384863.1| -----  
*X.fastidiosa* 9a5c |NP\_299042.1| -----  
*Acidovorax* JS42 |ZP\_01382702.1| -----  
*P.aeruginosa* PACS2 |ZP\_01366009.1| -----  
*R.metallidurans* CH34 |YP\_584510.1| -----  
*P.aeruginosa* 2192 |ZP\_00974810.1| -----  
*P.aeruginosa* str.C |AAN62129.1| -----  
*B.xenovorans* LB400 |YP\_559832.1| -----  
*X.c.campestris* ATCC33913 |NP\_638468.1| -----  
*N.eutropha* C91 |ABI58357.1| -----  
*X.c.campestris* 8004 |YP\_243101.1| -----  
*P.aeruginosa* SG17M |AAN62266.1| -----  
*R.gelatinosus* PM1 |ZP\_00242313.1| -----  
*Acidovorax* JS42 |ZP\_01384808.1| -----  
*Azoarcus* EbN1 |YP\_158431.1| -----  
*Azoarcus* EbN1 |YP\_158356.1| -----  
*A.a.citrulli* AAC00-1 |ZP\_01405034.1| -----  
*X.a.citri* 306 |NP\_642513.1| -----  
*P.aeruginosa* PA14 |AAP84130.1| -----MF 2  
*P.aeruginosa* 6077 |ABD94612.1| -----MELPMF 6  
*P.aeruginosa* C pKLC102 |AAP22591.1| -----MF 2  
*P.aeruginosa* C |AAP94681.1| -----  
*P.aeruginosa* 2192 |ZP\_00971291.1| -----  
*A.vinelandii* AvOP |ZP\_00419624.1| -----M 1  
*P.fluorescens* Pf-5 |YP\_261833.1| -----M 1  
*P.s.phaseolicola* |CAI36140.1| -----  
*P.syringae* BR2R |AAL99262.1| -----MGA 3  
*P.s.tomato* DC3000 |NP\_790676.1| -----MGT 3  
*P.s.syringae* B728a |YP\_233835.1| -----  
*P.putida* F1 |ZP\_00898124.1| -----MEGGARVRLSEKAKGFFE 19  
*P.fluorescens* Pfo-1 |YP\_348763.1| -----  
*H.influenzae* R2866 |ZP\_00157643.1| -----  
*H.influenzae* pICEhin1056|CAF29070.1| -----  
*H.influenzae* 86-028NP |YP\_247808.1| -----M 1  
*H.ducreyi* 35000HP |NP\_873395.1| -----  
*H.somnus* 129PT |YP\_718205.1| -----  
*M.aquaeolei* VT8 |ZP\_00817690.1| -----M 1  
*A.a.citrulli* AAC00-1 |ZP\_01407598.1| -----MDARGRQSRSRPALFHPTAGAGSRHAVNSVAARLLRLLPWSR 42  
*Azoarcus* EbN1 |YP\_157225.1| -----MAMLAAG----FLLVAAVLAVWLIWAS 23  
*E.coli* pAPEC-O1-R |ABF67837.1| -----MMNFRALYLICKRILGIFSSQENDATSVMIE 32  
*S.marcescens* R478 |NP\_941280.1| -----MMNFRALYLICKRILGIFSSQENDATSVMIE 32  
*S.typhi* R27 |NP\_058333.1| -----MNFALFLSMQRVFGIFSRRENDVSELMMK 30  
*S.e.e.typhi* CT18 pHCM1 |NP\_569454.1| -----MNFALFLSMQRVFGIFSRRENDVSELMMK 30  
*N.gonorrhoeae* MS11 |AAW83058.1| -----MKTSLLTTASS 11  
*P.resinovorans* pCAR1 |NP\_758664.1| MRRSKSRHSFSEPSGSNPSARHLPGGFFSTIKLPENETQGGIPHASFSAHN 50  
*P.vulgaris* UR-75 pRts1 |NP\_640161.1| -----  
**Consensus** .....

*P. rettgeri* |AAM08003.1| ----MFKNLFFQTKALPELS-----SQLDADI PRYPPFLKGLPAAS 37  
*V. cholerae* MO10 |EAZ47260.1| ----MFKNLFFQAKALPDLS-----SQLDAEIPRYPPFLKGLPAAS 37  
*V. cholerae* |ABA87024.1| ----MFKNLFFQAKALPELS-----SQLDAEIPRYPPFLKGLPAAS 37  
*Shewanella* W3-18-1 |YP\_962502.1| ----MFKKLFQAKAIPELS-----SQLDADI PRYPPFLKGLPAAS 37  
*Y.p. orientalis* IP275 |ZP\_01175343.1| -MLKALNKLFGGRSGVIETAPSARVLP LKDV EDEEIPRYPPFAKGLPVAP 49  
*X.c. vesicatoria* 85-10 |YP\_364087.1| ----MLS----LFQRKRPPVAAAP-----SPPPAIDL PKGLMRPESAA S 36  
*Acidovorax* JS42 |ZP\_01384863.1| ----MLS----LFQRKRPPVAAAP-----SPPPAIDL PKGLMRPESAA S 36  
*X. fastidiosa* 9a5c |NP\_299042.1| ----MLS----LFQRKRPPVAAATP-----SPAPATDL PKGLMRPESTAS 36  
*Acidovorax* JS42 |ZP\_01382702.1| ----MLS----LFQRKRPAVAAAP-----TPPSVTDL PKGLMRPESAA S 36  
*P. aeruginosa* PACS2 |ZP\_01366009.1| ----MLF----LFQRKRPPVAAAP-----SPAPALDL PKGLLRPESAA S 36  
*R. metallidurans* CH34 |YP\_584510.1| ---HMLS----LFQRKRPAVATAP-----TPPPASDL PKGLMRPESAA S 86  
*P. aeruginosa* 2192 |ZP\_00974810.1| -----MRPESAA S 8  
*P. aeruginosa* str.C |AAN62129.1| ----MLS----LFQRKRPAVATAP-----TPPPASDL PKGLMRPESAA S 36  
*B. xenovorans* LB400 |YP\_559832.1| ----MLS----LFQRKRPPVASAP-----SPAPSNDL PKGLR RPESAA S 36  
*X.c. campestris* ATCC33913 |NP\_638468.1| ----MLR----LFQRK-SAVLPPV-----AAVTETALS KGLLQPKPAAE 35  
*N. eutropha* C91 |ABI58357.1| ----MLS----LFQRKRLPTTDM-----AMPSTAPPKGM RPESAA S 36  
*X.c. campestris* 8004 |YP\_243101.1| ----MLS----LFQRKRASVAAAA-----SPGPTTDL PKGLTRPETAAS 36  
*P. aeruginosa* SG17M |AAN62266.1| ----MLS----LLQRKRVSPTAGA-----PATPASDSPKRLTQPESATA 36  
*R. gelatinosus* PM1 |ZP\_00242313.1| -----MRPESAA S 8  
*Acidovorax* JS42 |ZP\_01384808.1| ----MLS----LFQRKRVPPTAGT-----PPTSAIETPKGSM RPESAA S 36  
*Azoarcus* EbN1 |YP\_158431.1| ----MIS----LFQRKRVPATGA-----PPT-LTEPPKGLMRPASAAS 35  
*Azoarcus* EbN1 |YP\_158356.1| ----MLS----LFQRKRVTPTVGA-----PITPPPEAPKGLMG PESAA S 36  
*A.a. citrulli* AAC00-1 |ZP\_01405034.1| ----MFR----LFRRAGAASTTERTPANAPPVAATTPSLPGWTARQSASE 43  
*X.a. citri* 306 |NP\_642513.1| ----MFRPQLFQRAGRQASTIATTC--PETVPDRGSAPGWRTPLSASE 44  
*P. aeruginosa* PA14 |AAP84130.1| QLLS-----WISRKPSPTPTTKA-----APGGFILPLSSME 33  
*P. aeruginosa* 6077 |ABD94612.1| QLLS-----WISRKPSPTPTTKA-----APGGFIPPLSSME 37  
*P. aeruginosa* C pKLC102 |AAP22591.1| QLLS-----WISRKPSPTPTTKA-----APGVFLPLSSSTE 33  
*P. aeruginosa* C |AAP94681.1| -----ME 2  
*P. aeruginosa* 2192 |ZP\_00971291.1| -----ME 2  
*A. vinelandii* AvOP |ZP\_00419624.1| SLLT-----WLGRKSAE-PTSEA-----PSQGFHSPARAAV 31  
*P. fluorescens* Pf-5 |YP\_261833.1| QILS-----WLSRKPAR-PPSEA-----TAQGFHLPVNAAA 31  
*P.s. phaseolicola* |CAI36140.1| -----  
*P. syringae* BR2R |AAL99262.1| YMLS-----FFTRRKAS-PISSN-----NAAGFFKPESPD A 33  
*P.s. tomato* DC3000 |NP\_790676.1| SMLS-----FFQRKTS-PTTPS-----NAAGFTKPESAD A 33  
*P.s. syringae* B728a |YP\_233835.1| -MLS-----FFTRRKAS-PISSN-----AAAGFFKPESPD A 29  
*P. putida* F1 |ZP\_00898124.1| RKTGTAMKRWWFKPQKGLPEESTP-----AAVGFHQPLSAES 56  
*P. fluorescens* PfO-1 |YP\_348763.1| ----MLSLFRHKRQKPPPPPTVN-----VAEGLYSIESAHT 32  
*H. influenzae* R2866 |ZP\_00157643.1| -----MDDEGWITPFTASE 14  
*H. influenzae* pICEhin1056 |CAF29070.1| ----MLSSIFHKIRGKKQDSL NITSSLKNLNSSTFKVDDEGWITPFTASE 46  
*H. influenzae* 86-028NP |YP\_247808.1| GYFFMFSSIFYRLKGGKQDSFTIP-VLD SHNHSMSKIDSEGWITPFSASE 50  
*H. ducreyi* 35000HP |NP\_873395.1| ----MISIFHKILNHKNDKSPPTPIQSQ---QSQTSDSGWLTPLSAKA 42  
*H. somnus* 129PT |YP\_718205.1| ----MFKSLIQFFKSKSNTS---NIKKENAVQRQERQDIEGWITPYSGQE 43  
*M. aquaeolei* VT8 |ZP\_00817690.1| IRPFLVQVSMGFDQNHSAE **DSMFKRLMRK**ELTSSPEPKTP EYAVALS GKD 51  
*A.a. citrulli* AAC00-1 |ZP\_01407598.1| AVAATSPNAGAGAAVTSSGQPPAGDGSAAPTFP RVAGSQPGWLRVLEAEQ 92  
*Azoarcus* EbN1 |YP\_157225.1| YHDRSGRRASCPAAPDAAGSPTATAGDAR----ALAASRPGWLQVLDAST 69  
*E. coli* pAPEC-O1-R |ABF67837.1| DISSLSPFAQILGDQKYTVPDHPNPEVLK FIEYPTRP TGIQT FNEQ **SILS** 82  
*S. marcescens* R478 |NP\_941280.1| DISSLSPFAQILGDQKYTVPDHPNPEVLK FIEYPTRP TGIQT FNEQ **SILS** 82  
*S. typhi* R27 |NP\_058333.1| DAANFS PFAQIIGEQKYTVPDHPNPEVLK FIEYPTRP AGIQT FNEQ **SILS** 80  
*S.e.e. typhi* CT18 pHCM1 |NP\_569454.1| DAANFS PFAQIIGEQKYTVPDHPNPEVLK FIEYPTRP AGIQT FNEQ **SILS** 80  
*N. gonorrhoeae* MS11 |AAW83058.1| **IMLVSGSMLYLI**INTRKSTDSVSHN----DEVAHINQNI VNRDRFILNAHE 57  
*P. resinovorans* pCAR1 |NP\_758664.1| MAEKRMPPFSFLKRLWPRSERAL TDSFAHPAEQMITP **PEIKRYLE**NHNWRN 100  
*P. vulgaris* UR-75 pRts1 |NP\_640161.1| ---MFNRLKTLFSGKRTPKPTVNQI IMPAEVVEALTGSGDILRYPPAELG 47  
.....

**Consensus**

*P. rettgeri* |AAM08003.1| PEDLQS-----TQ**DELI**AKLRQ-VLGFNQDRDFQRLIQPC 70  
*V. cholerae* MO10 |EAZ47260.1| PEDLQS-----TQ**DELI**AKLRQ-VLGFNLRDFQRLIQPC 70  
*V. cholerae* |ABA87024.1| PEDLQS-----TQ**DELI**AKLRQ-VLGFNQREFQRLIQPC 70  
*Shewanella* W3-18-1 |YP\_962502.1| PEELQS-----TQ**DELI**AKLRQ-VLGFNQDRDFQKLIQPC 70  
*Y.p. orientalis* IP275 |ZP\_01175343.1| LDKILA-----TQ**AELIEKVRN**-SLGFTVDDFNRLVLPV 82  
*X.c. vesicatoria* 85-10 |YP\_364087.1| LLATP-----RR**QKLE**HIWQ-RTLSRRQFATLYRAP 68  
*Acidovorax* JS42 |ZP\_01384863.1| LLATP-----RR**QKLE**HIWQ-RTLSRRQFATLYRAP 68  
*X. fastidiosa* 9a5c |NP\_299042.1| LLATP-----RR**QKLM**EHWQ-HTLSRRQFATLYRAP 68  
*Acidovorax* JS42 |ZP\_01382702.1| LLATP-----RR**QKLE**HIWQ-RTLSRRQFATLYRAP 68  
*P. aeruginosa* PACS2 |ZP\_01366009.1| LLATP-----RR**QKLE**EYIWQ-RTLSRRQFVTTYRTP 68  
*R. metallidurans* CH34 |YP\_584510.1| LLATP-----RR**QKLE**HIWQ-RTLSRRQFAVLYRAP 118  
*P. aeruginosa* 2192 |ZP\_00974810.1| LLATP-----RR**QKLE**HIWQ-RTLSRRQFAVLYRAP 40  
*P. aeruginosa* str.C |AAN62129.1| LLATP-----RR**QKLE**HIWQ-RTLSRRQFAVLYRAP 68  
*B. xenovorans* LB400 |YP\_559832.1| LLATP-----RR**QKLE**HIWQ-RTLSRRQFATLYRAP 68  
*X.c. campestris* ATCC33913 |NP\_638468.1| LLATP-----RR**QKLE**HIWQ-RTLSRRQFHTLYRVP 67  
*N. eutropha* C91 |ABI58357.1| LLATP-----RR**QRL**LEHIWQ-RTLSRRQFASLYRAP 68  
*X.c. campestris* 8004 |YP\_243101.1| LLATP-----RR**QKLE**HIWQ-RTLSRRQFDTTYRTP 68  
*P. aeruginosa* SG17M |AAN62266.1| LLSTP-----RR**QRL**LEHIWQ-RTLSRRQFTALYLAP 68  
*R. gelatinosus* PM1 |ZP\_00242313.1| LLATP-----RR**QKLE**HIWQ-RTLSRRQFATLYLAP 40  
*Acidovorax* JS42 |ZP\_01384808.1| LLATP-----RR**QKLE**HIWQ-RTLSRRQFATLYLAP 68  
*Azoarcus* EbN1 |YP\_158431.1| LLATP-----RR**QKLE**HIWQ-RTLSRRQFATLYLAP 67  
*Azoarcus* EbN1 |YP\_158356.1| LLATP-----RR**QKLE**HIWQ-RTLSRRQFATLYLAP 68  
*A.a. citrulli* AAC00-1 |ZP\_01405034.1| LLAPA-----RR**QRL**LEHIWQ-RTLSRAQFDQLYLGP 75  
*X.a. citri* 306 |NP\_642513.1| LLAPV-----RR**QQL**LEHIWQ-RTLSRAQFDALYLAP 76  
*P. aeruginosa* PA14 |AAP84130.1| LLGTP-----RR**RQL**LENIWQ-RASLSKQFEEIYRRP 65  
*P. aeruginosa* 6077 |ABD94612.1| LLGTP-----RR**RQL**LENIWQ-RASLSKQFEEIYRRP 69  
*P. aeruginosa* C pKLC102 |AAP22591.1| LLDTP-----RR**RQL**LENIWQ-RASLSKQFEEIYRRP 65  
*P. aeruginosa* C |AAP94681.1| LLGTP-----RR**RQL**LENIWQ-RASLSKQFEEIYRRP 34  
*P. aeruginosa* 2192 |ZP\_00971291.1| LLGTP-----RR**RQL**LENIWQ-RASLSKQFEEIYRRP 34  
*A. vinelandii* AvOP |ZP\_00419624.1| LFDTP-----RR**QH**LENIWQ-RASLSRRQFDALYRQP 63  
*P. fluorescens* Pf-5 |YP\_261833.1| LLNTP-----RR**QEL**LENIWR-RASLSHQFNTLYRQP 63  
*P.s. phaseolicola* |CAI36140.1| -----MQA 3  
*P. syringae* BR2R |AAL99262.1| LLSSS-----RR**RQL**LENIWQ-RTSLPREQFETLYMQA 65  
*P.s. tomato* DC3000 |NP\_790676.1| LLSTP-----RR**RQL**LENIWQ-RTSLPRTQFDTTYVQA 65  
*P.s. syringae* B728a |YP\_233835.1| LLSTS-----RR**RQL**LENIWQ-RTSLPREQFEALYMQA 61  
*P. putida* F1 |ZP\_00898124.1| LLAAS-----HR**KKLL**ARIWQ-YTALSPQFEQLYLEP 88  
*P. fluorescens* PfO-1 |YP\_348763.1| LLAVE-----HR**RQL**LDRIWQ-CTALSHVQFTQFYLN 64  
*H. influenzae* R2866 |ZP\_00157643.1| LLNSE-----LR**QKYL**NLLWQ-QVSMTQDMFNELYKKP 46  
*H. influenzae* pICEhin1056 |CAF29070.1| LLNSE-----LR**QKYL**NLLWQ-QVSMTQDMFNELYKKP 78  
*H. influenzae* 86-028NP |YP\_247808.1| LLNSE-----LR**QKYL**NLLWQ-QVSMTQDMFNELYKKP 82  
*H. ducreyi* 35000HP |NP\_873395.1| LLKTE-----LR**QKYL**NILWQ-QVSMTQDMFNESLYQRP 74  
*H. somnus* 129PT |YP\_718205.1| LLNTE-----LR**QH**HLGLLWQ-QVSMTREMFHEHLYQKP 75  
*M. aquaeolei* VT8 |ZP\_00817690.1| LLKQP-----KR**TEL**ISRVRK-LFSVTEQVWNKHLYA 83  
*A.a. citrulli* AAC00-1 |ZP\_01407598.1| LLTTV-----QA**SRA**LQEIWR-KSNQSRETWERDLLPA 124  
*Azoarcus* EbN1 |YP\_157225.1| LIQVC-----**NLAGALQ**QIHR-ESKLSQAVWERDFAPA 101  
*E. coli* pAPEC-O1-R |ABF67837.1| **LYRE**KL-----HSISMMLAISDSDIRDAYTFTNLVLKP 116  
*S. marcescens* R478 |NP\_941280.1| **LYRE**KL-----HSISMMLAISDSDIRDAYTFTNLVLKP 116  
*S. typhi* R27 |NP\_058333.1| **LYRD**KL-----HSISMMLAISDGDIREDAYTFTNLVLKP 114  
*S.e.e. typhi* CT18 pHCM1 |NP\_569454.1| **LYRD**KL-----HSISMMLAISDGDIREDAYTFTNLVLKP 114  
*N. gonorrhoeae* MS11 |AAW83058.1| LIQVLD-----LSPQISGIKMN--LGLSDENWSKDALPF 89  
*P. resinovorans* pCAR1 |NP\_758664.1| LRYPPYQEGYPGLVSGQWFMRNQHELFDRIIH-SVGMPPASDLKLYVEPI 149  
*P. vulgaris* UR-75 pRts1 |NP\_640161.1| FPAQVPG-----FALLSLQEE**IISKIKR**-ELMIRDAEYDEYIQPM 86  
.....

**Consensus**

*P.rettgeri* |AAM08003.1|  
*V.cholerae* MO10 |EAZ47260.1|  
*V.cholerae* |ABA87024.1|  
*Shewanella* W3-18-1 |YP\_962502.1|  
*Y.p.orientalis* IP275 |ZP\_01175343.1|  
*X.c.vesicatoria* 85-10 |YP\_364087.1|  
*Acidovorax* JS42 |ZP\_01384863.1|  
*X.fastidiosa* 9a5c |NP\_299042.1|  
*Acidovorax* JS42 |ZP\_01382702.1|  
*P.aeruginosa* PACS2 |ZP\_01366009.1|  
*R.metallidurans* CH34 |YP\_584510.1|  
*P.aeruginosa* 2192 |ZP\_00974810.1|  
*P.aeruginosa* str.C |AAN62129.1|  
*B.xenovorans* LB400 |YP\_559832.1|  
*X.c.campestris* ATCC33913 |NP\_638468.1|  
*N.eutropha* C91 |ABI58357.1|  
*X.c.campestris* 8004 |YP\_243101.1|  
*P.aeruginosa* SG17M |AAN62266.1|  
*R.gelatinosus* PM1 |ZP\_00242313.1|  
*Acidovorax* JS42 |ZP\_01384808.1|  
*Azoarcus* EbN1 |YP\_158431.1|  
*Azoarcus* EbN1 |YP\_158356.1|  
*A.a.citrulli* AAC00-1 |ZP\_01405034.1|  
*X.a.citri* 306 |NP\_642513.1|  
*P.aeruginosa* PA14 |AAP84130.1|  
*P.aeruginosa* 6077 |ABD94612.1|  
*P.aeruginosa* C pKLC102 |AAP22591.1|  
*P.aeruginosa* C |AAP94681.1|  
*P.aeruginosa* 2192 |ZP\_00971291.1|  
*A.vinelandii* AvOP |ZP\_00419624.1|  
*P.fluorescens* Pf-5 |YP\_261833.1|  
*P.s.phaseolicola* |CAI36140.1|  
*P.syringae* BR2R |AAL99262.1|  
*P.s.tomato* DC3000 |NP\_790676.1|  
*P.s.syringae* B728a |YP\_233835.1|  
*P.putida* F1 |ZP\_00898124.1|  
*P.fluorescens* Pf0-1 |YP\_348763.1|  
*H.influenzae* R2866 |ZP\_00157643.1|  
*H.influenzae* pICEhin1056 |CAF29070.1|  
*H.influenzae* 86-028NP |YP\_247808.1|  
*H.ducreyi* 35000HP |NP\_873395.1|  
*H.somnus* 129PT |YP\_718205.1|  
*M.aquaeolei* VT8 |ZP\_00817690.1|  
*A.a.citrulli* AAC00-1 |ZP\_01407598.1|  
*Azoarcus* EbN1 |YP\_157225.1|  
*E.coli* pAPEC-O1-R |ABF67837.1|  
*S.marcescens* R478 |NP\_941280.1|  
*S.typhi* R27 |NP\_058333.1|  
*S.e.e.typhi* CT18 pHCM1 |NP\_569454.1|  
*N.gonorrhoeae* MS11 |AAW83058.1|  
*P.resinovorans* pCAR1 |NP\_758664.1|  
*P.vulgaris* UR-75 pRts1 |NP\_640161.1|

**Consensus**

**HD domain consensus**

IDHLAAYVHLLPASEHHHSGAGLLRHSLEVAFWAAQAEGIIFVASGT 120  
IDHLAAYVHLLPASEHHHSGAGLLRHSLEVAFWAAQAEGIIFVASGT 120  
IDHLAAYVHLLPASEHHHSGAGLLRHSLEVAFWAAQAEGIIFVASGT 120  
IDHLAAYVHLLPASEHHHSGAGLLRHSLEVAFWAAQAEGIIFVASGT 120  
IQRYAAFVHLLPASEHHHRGAGGLFRHGLEVAFWAAQASESVIFSIEGT 132  
LERYAELVQGFPASEAHHHAYLGGMLDHGLEIVAYGLKLRQSHLLPVGAS 118  
LERYAELAQGFPASEAHHHAYLGGMLDHGLEIVAYGLKLRQSHLLPVGAS 118  
LERYAELVQVFPASEHHHAYPGGMLDHGLEIVAYSCLKLRQSHLLPIGAT 118  
LERYAELVQAFPASEAHHHAYPGGMLDHGLEIVAYSCLKLRQSHLLPIGAS 118  
LERYAELVQQFPASESHHHAYPGGMLDHGLEIVAYSCLKLRQSHLLPIGAS 118  
LERYAELVQAFPASESHHHAYPGGMLDHGLEIVAYALKLRQSHLLPIGAS 168  
LERYAELVQAFPASESHHHAYPGGMLDHGLEIVAYALKLRQSHLLPIGAS 90  
LERYAELVQAFPASESHHAYPGGMLDHGLEIVAYALKLRQSHLLPIGAS 118  
LERYAELVQRFPASEAHHHAYPGGMLDHGLEIVAYALKLRQSHLLPAGST 118  
LERYADLVQGFPASESHHHAYLGGMLDHGLEIVAFLKLRQSHLLPAGAS 117  
LERYAELVQLFPASESHHHAYPGGMLDHGLEIVAYALKLRQSHLLPAGTT 118  
LERYAALVQQFPASESHHHAYHGGMLDHGLEIVAYALKLRQSYLLPAGAT 118  
LERYASLVQGFPASESHHHAYSGGMLDHGLEIVAYALKLRQSYLLPTGTT 118  
LERYAELVQGFPASENHHHAYPGGMLDHGLEIVAYALKLRQSYLLPAGVT 90  
LERYAELVQGFPASENHHHAYPGGMLDHGLEIVAYALKLRQSYLLPAGVT 118  
LERYVELVQGFPASESHHHAYPGGMLDHGLEIVAYALKLRQSHLLPAGAT 117  
LERYAELVQGFPASESHHHAYPGGMLDHGLEIVAYALKLRQSHLLPAGAS 118  
IRRYAEFVQSFPASESHHHAYPGGMLDHGLEIVAYALKLRQSHLLPAGAT 125  
IQRYAEMVQLFPASESHHHAYPGGMLDHGLEIVAYALKLRQSYLLPAGAT 126  
LANYAELVQQLPASENHHHAHPGGMIDHGLEIVAYALKVRQTYLLPIGAA 115  
LANYAELVQQLPASENHHHAHPGGMIDHGLEIVAYALKVRQTYLLPIGAA 119  
LANYAELVQQLPASENHHHAHPGGMIDHGLEIVAYALKVRQTYLLPIGAA 115  
LANYAELVQQLPASENHHHAHPGGMIDHGLEIVAYALKVRQTYLLPIGAA 84  
LANYAELVQQLPASENHHHAHPGGMIDHGLEIVAYALKVRQTYLLPIGAA 84  
LERYAELVQQLPASENHHHAHLGGLLDHGLEIVAYALKIRQTYLLPIGAP 113  
LERYAELVQLMPASENHHHAHLGGLLDHGLEIVAYALKIRQTYLLPIGAP 113  
FKSYAALVQHLPASESHHHAYHGGMLDHGLEIVAYALKIRQMYLLPIGAP 53  
FKSYAALVQHLPASESHHHAYHGGMLDHGLEIVAYALKIRQMYLLPIGAP 115  
FKSYAALVQHLPASESHHHAYHGGMLDHGLEIVAYALKIRQMYLLPIGAP 115  
FKSYAALVQHLPASESHHHAYHGGMLDHGLEIVAYALKIRQMYLLPIGAP 111  
IRRYATYVQQLPASESHHHAYPGGMLDHGLELVACSLKLRQSYLLPGGAA 138  
IHRYAEVQQLPASETHHHAYLGGMLDHGLELVACSLKLRQSYLLPTGAA 114  
IERYAEMVQLLPASEAHHHSHLGGMLDHGLEVLVSFAKLRQSYVLPQNAA 96  
IERYAEMVQLLPASEAHHHSHLGGMLDHGLEVLVSFAKLRQSYVLPQNAA 128  
IERYAEMVQLLPASESHHHSHLGGMLDHGLEVLVSFAKLRQSYVLPQNAA 132  
IERYAEMVQLLPASEAHHHAPLGGMLDHGLEVLVSFAKLRQSYVLPQNAA 124  
IERYAEMVQLLPASESHHHSHLGGMLDHGLEVLVSFAKLRQSYVLPQNAA 125  
IEQFAELVQEVPASEIHHHSESGGLIDHTLEALYAGVRISQGYILPPNAE 133  
IHRYAEFVQLMPASEAHHHAHAGGLLSHTTEMLLAAMTWRNAHLLPGGSE 174  
IGQTLRYVQQLPASEAHHHAHVGGGLAAHTVEVVAHAIAIRNGYLLPRGGA 151  
LVEYVRWIHLLPASEHHHNGIGLLSHSLEVAIILSLKNAHNSLERPIGY 166  
LVEYVRWIHLLPASEHHHNGIGLLSHSLEVAIILSLKNAHNSLERPIGY 166  
LIEYIRWIHLLPASEHHHNGIGLLSHSLEVAMISLKNANHSLERPIGY 164  
LIEYIRWIHLLPASEHHHNGIGLLSHSLEVAMISLKNANHSLERPIGY 164  
LEKYIAFVQRLPASESHHAGDGGGLVRHTLDVAALALVASTSQSWPPNAK 139  
LVNFAELAHMLPASESHHSGPGGLLRHSLEVASLTDGCLTAFDFTNET 199  
LTNFAFNVHLLPASEFHHHRAQGGLLRHTLEVLVYSIKIAKSEFFDANES 136  
LERYAELVQQLPASE.HHHAYPGGMLDHGLEIVAYALKLRQSYLLPIGAT

: ..\*\*\* \*\* \* : \* :

H.b.....s.h

*P. rettgeri* |AAM08003.1|  
*V. cholerae* MO10 |EAZ47260.1|  
*V. cholerae* |ABA87024.1|  
*Shewanella* W3-18-1 |YP\_962502.1|  
*Y.p. orientalis* IP275 |ZP\_01175343.1|  
*X.c. vesicatoria* 85-10 |YP\_364087.1|  
*Acidovorax* JS42 |ZP\_01384863.1|  
*X. fastidiosa* 9a5c |NP\_299042.1|  
*Acidovorax* JS42 |ZP\_01382702.1|  
*P. aeruginosa* PACS2 |ZP\_01366009.1|  
*R. metallidurans* CH34 |YP\_584510.1|  
*P. aeruginosa* 2192 |ZP\_00974810.1|  
*P. aeruginosa* str.C |AAN62129.1|  
*B. xenovorans* LB400 |YP\_559832.1|  
*X.c. campestris* ATCC33913 |NP\_638468.1|  
*N. eutropha* C91 |ABI58357.1|  
*X.c. campestris* 8004 |YP\_243101.1|  
*P. aeruginosa* SG17M |AAN62266.1|  
*R. gelatinosus* PM1 |ZP\_00242313.1|  
*Acidovorax* JS42 |ZP\_01384808.1|  
*Azoarcus* EbN1 |YP\_158431.1|  
*Azoarcus* EbN1 |YP\_158356.1|  
*A.a. citrulli* AAC00-1 |ZP\_01405034.1|  
*X.a. citri* 306 |NP\_642513.1|  
*P. aeruginosa* PA14 |AAP84130.1|  
*P. aeruginosa* 6077 |ABD94612.1|  
*P. aeruginosa* C pKLC102 |AAP22591.1|  
*P. aeruginosa* C |AAP94681.1|  
*P. aeruginosa* 2192 |ZP\_00971291.1|  
*A. vinelandii* AvOP |ZP\_00419624.1|  
*P. fluorescens* Pf-5 |YP\_261833.1|  
*P.s. phaseolicola* |CAI36140.1|  
*P. syringae* BR2R |AAL99262.1|  
*P.s. tomato* DC3000 |NP\_790676.1|  
*P.s. syringae* B728a |YP\_233835.1|  
*P. putida* F1 |ZP\_00898124.1|  
*P. fluorescens* PfO-1 |YP\_348763.1|  
*H. influenzae* R2866 |ZP\_00157643.1|  
*H. influenzae* pICEhin1056 |CAF29070.1|  
*H. influenzae* 86-028NP |YP\_247808.1|  
*H. ducreyi* 35000HP |NP\_873395.1|  
*H. somnus* 129PT |YP\_718205.1|  
*M. aquaeolei* VT8 |ZP\_00817690.1|  
*A.a. citrulli* AAC00-1 |ZP\_01407598.1|  
*Azoarcus* EbN1 |YP\_157225.1|  
*E. coli* pAPEC-O1-R |ABF67837.1|  
*S. marcescens* R478 |NP\_941280.1|  
*S. typhi* R27 |NP\_058333.1|  
*S.e.e. typhi* CT18 pHCM1 |NP\_569454.1|  
*N. gonorrhoeae* MS11 |AAW83058.1|  
*P. resinovorans* pCAR1 |NP\_758664.1|  
*P. vulgaris* UR-75 pRts1 |NP\_640161.1|

**Consensus**

**HD domain consensus**

PVEKKELEPRWRVAAALGGLFHDIKGPVSDLSITD-----EDGRYQWNPF 165  
PVEKKELEPRWRVAAALGGLFHDIKGPVSDLSITD-----EDGRYQWNPF 165  
PVEKKELEPRWRVAAALGGLFHDIKGPVSDLSITD-----EDGRYQWNPF 165  
PVEKKELEPRWRVAAALGGLFHDIKGPVSDLSITD-----EDGRYQWNPF 165  
PRRRRDNEPRWRVLAASCFSGLLHDVGKPLSDV SITD-----KDGSITWNPY 177  
PEDQAAQAEAWTAAVAYAALLHDIGKIAVDLHVEL-----ADGSTWHPW 162  
PEDQAAQAEAWTAAVAYAALLHDIGKIAVDLHVEL-----ADGSTWHPW 162  
PEDQAAQAEAWTAAVAYAALLHDIGKIAVDLHVEL-----ADGSTWHPW 162  
PEDQAAQSAEAWTAAVAYAALLHDIGKIAVDLHVEL-----ADGSLWHPW 162  
PEDQAAQSAEAWTAAVAYAALLHDIGKIAVDLHVEL-----ADGNTWHPW 162  
PEDQAAQAEAWTAAVAYAALLHDIGKIAVDLHVEL-----ADGSLWHPW 212  
PEDQAAQAEAWTAAVAYAALLHDIGKIAVDLHVEL-----ADGSLWHPW 134  
PEDQAAQAEAWTAAVAYAALLHDIGKIAVDLHVEL-----ADGSLWHPW 162  
PEDQAAQSAEAWTAAVAYAALLHDV GKLAVDLHVEL-----ADGSTWHPW 162  
PEDQAAQAEAWTAAVAYAALLHDIGKIAVDLHVEL-----QGGRWHPW 161  
PEDQAAQAEAWTAATAAYAALLHDIGKIAVDLHVEH-----EDGSPWHPW 162  
PEDQAAQAEAWTAATAAYAALLHDIGKIAVDLHVEQ-----ADGSVWHPW 162  
PEDQVIQAEAWTAAIAYAALLHDIGKIAVDLHVEY-----GDGSQWHPW 162  
PEAQAAQAEAWTAGTAYAALLHDIGKIAVDLHVEH-----ADGSVWHPW 134  
PEAQAAQAEAWTAGTAYAALLHDIGKIAVDLHVEH-----ADGSVWHPW 162  
PEAQAAQAEAWTAGTAYAALLHDIGKIAVDLHVEY-----VDGTVWHPW 161  
PEAQAAQAEAWTAGTAYAALLHDIGKIAVDLHVEY-----EDGTRWHPW 162  
PEAQAAQAEAWTAGVAYAALLHDIGKIAVDLEVEL-----DDGSRWNW 169  
PESQAAQAEAWTAGVAYAALLHDIGKIAVDIDV EQ-----EDGSARW 170  
PESQSAQAEAWSAASAYGALAHDIGKIVVDLQVEL-----QDGSTWHPW 159  
PESQSAQAEAWSAASAYGALAHDIGKIVVDLQVEL-----QDGSTWHPW 163  
PESQSAQTFAWSAASAYGALAHDIGKIVVDLQVEL-----QDGSTWHPW 159  
PESQSAQAEAWSAASAYGALAHDIGKIVVDLQVEL-----QDGSTWHPW 128  
PESQSAQAEAWSAASAYGALAHDIGKIVVDLQVEL-----QDGSTWHPW 128  
PESQSAQAEAWSAASAYGALLHDLGKVAVDVQVEL-----QGGTAWHPW 157  
PESQSAQAEAWTAAAYGALLHDLGKVAVDIRVEL-----QGGQIWHHPW 157  
PESQAAQSAEAWSAASAYGALVHDLGKIAVDVKVEL-----ADGTIWHHPW 97  
PESQAAQSAEAWSAASAYGALVHDLGKIAVDVKVEL-----ADGTIWHHPW 159  
PESQAAQSAEAWSAASAYGALVHDLGKIAVDVKVEL-----ADGTTWHPW 159  
PESQAAQSAEAWSAASAYGALVHDLGKIAVDVKVEL-----ADGTIWHHPW 155  
PEDQAAQADAWSAAIAYGALLHDV GKIAVDLQVEY-----QNGDRWHPW 182  
PEDQAAQTDAWSAITAYGALLHDIGKIAVDL LVER-----QDGRVWHPW 158  
PEEQSRQRDAWTAAVIYAALVHDIGKVI VDIIEIQL-----KDGSRWHPW 140  
PEEQSRQRDAWTAAVIYAALVHDIGKVI VDIIEIQL-----KDGSRWHPW 172  
PEEQSKQRDAWTAAVIYAALVHDIGKVI VDIIDIQL-----KDGSRWHPW 176  
PEEQSKQRDAWTAAVIQALVHDIGKI IVDIIEIQL-----KDGRWHPW 168  
PEDQAKQKDAWTAAVIYLALVHDIGKSI VDIIEIQL-----QDGRWHPW 169  
PESI AESADRWRFAAMIAILSHDLGKI VTDIEVVYRL--PEKQFQIWHHPW 181  
IEEVDAQRDQWTVYVFFAALLHDIAKPM TDLRIQWRC-DGMAD SIRWAAT 223  
AEVVDRQRDHWTYAVIFAALLHDIGKPM TDLRVVLAE-RADGPLRPWHPM 200  
QDEEVVRRKVLYLAAFICGLVHDAGKVY DLDI VSLN----LASPIIWTPS 212  
QDEEVVRRKVLYLAAFICGLVHDAGKVY DLDI VSLN----LASPIIWTPS 212  
QDEEVVRRKVLYLAAFICGLVHDAGKVY DLDI VSLN----LSETLTWAPS 210  
QDEEVVRRKVLYLAAFICGLVHDAGKVY DLDI VSLN----LSETLTWAPS 210  
TEETIAKKTAVWRYGIMCAALLHDV GKT VTFQVELFDSAISLEKLLWLPD 189  
PARRSMRLRRWYVAGIASLLHDAGKPLT DIRATD-----FEGNNQWIIYA 244  
PVIKSDRALAWRIAVVGVVMHDIKGPIS DVDVWDK-----SGEKHWHPA 181  
PEDQAAQAEAWTAAVAYAALLHDIGKIA VDLHVEL.....ADGSTWHPW

:               : \*\* .\*

h..sshhHDhsc

*P.rettgeri* |AAM08003.1| LETLS--QWTTNNSIERYFIRWRD-----GRCKRHEQFSILVLNRVMTP 207  
*V.cholerae* MO10 |EAZ47260.1| LETLS--QWTTNNSIERYFIRWRD-----GRCKRHEQFSILVLNRVMTP 207  
*V.cholerae* |ABA87024.1| LETLS--QWTTNNSIERYFIRWRD-----GRCKRHEQFSILVLNRVMTP 207  
*Shewanella* W3-18-1 |YP\_962502.1| LETLS--QWTTNNSIERYFIRWRD-----GRCKRHEQFSILVLNRVMTP 207  
*Y.p.orientalis* IP275 |ZP\_01175343.1| SESLH--DWAHRHEIDRYFIRWRD-----KRHKRHEQFSLLAVDRIIPA 219  
*X.c.vesicatoria* 85-10 |YP\_364087.1| HG-----PLRQPYRFYRDDRE-----YRLHSAATGLLYRQLLDR 197  
*Acidovorax* JS42 |ZP\_01384863.1| HG-----PLRQPYRFYRDDRE-----YRLHSAATGLLYRQLLDR 197  
*X.fastidiosa* 9a5c |NP\_299042.1| HG-----PLRQPYRFYRDDRE-----YRLHSAATGLLYRQLLDR 197  
*Acidovorax* JS42 |ZP\_01382702.1| HG-----PLHQPYRFYRDDRE-----YRLHSAATGLLYRQLLDR 197  
*P.aeruginosa* PACS2 |ZP\_01366009.1| HG-----PLLQPYRFYREDRE-----YRLHSAATGLLYRQLLDR 197  
*R.metallidurans* CH34 |YP\_584510.1| YG-----PLHQPYRFYRDDRE-----YRLHSAATGLLYRQLLDT 247  
*P.aeruginosa* 2192 |ZP\_00974810.1| YG-----PLHQPYRFYRDDRE-----YRLHSAATGLLYRQLLDT 169  
*P.aeruginosa* str.C |AAN62129.1| YG-----PLHQPYRFYRDDRE-----YRLHSAATGLLYRQLLDT 197  
*B.xenovorans* LB400 |YP\_559832.1| HG-----PLRQPYRFYREDRE-----YRLHSAATGLLYRQLLDA 197  
*X.c.campestris* ATCC33913 |NP\_638468.1| HG-----PLSQPYRFYRHREGRE-----YRLHGAATGLLYSRILDS 196  
*N.eutropha* C91 |ABI58357.1| HG-----PLTRPYRFYREDRE-----YRLHSAATGLLYTRVLGD 197  
*X.c.campestris* 8004 |YP\_243101.1| HG-----QLKQPYRFYREDRE-----YRLHSAATGLLYHQVIDR 197  
*P.aeruginosa* SG17M |AAN62266.1| HG-----PLSQPYRFYRQDRE-----YRLHSAATGLLYRQVLDD 197  
*R.gelatinosus* PM1 |ZP\_00242313.1| HG-----PLRKPYRFYRKERE-----YRLHSAATGLLYARLLDR 169  
*Acidovorax* JS42 |ZP\_01384808.1| HG-----PLRKPYRFYRKERE-----YRLHSAATGLLYARLLDR 197  
*Azoarcus* EbN1 |YP\_158431.1| HG-----PLRRPYRFYRTDCE-----YRLHSAAGLLYARLLDP 196  
*Azoarcus* EbN1 |YP\_158356.1| HG-----PLRKPYRFYHKARE-----YRLHGAATGLFYTRLLDA 197  
*A.a.citrulli* AAC00-1 |ZP\_01405034.1| HG-----VLRQPYRFYRRGRE-----YRLHGAASGLLYLQILDR 204  
*X.a.citri* 306 |NP\_642513.1| HG-----VLRQPYRFYRSGRE-----YRLHGAAGLLYARVLD 205  
*P.aeruginosa* PA14 |AAP84130.1| NG-----PINQPYRFKYVKSRE-----YQLHGAASALLIHQLLFR 194  
*P.aeruginosa* 6077 |ABD94612.1| NG-----PINQPYRFKYVKSRE-----YQLHGAASALLIHQLLFR 198  
*P.aeruginosa* C pKLC102 |AAP22591.1| NG-----PINQPYRFKYVKSRE-----YQLHGAASALLIHQLLFR 194  
*P.aeruginosa* C |AAP94681.1| NG-----PINQPYRFKYVKSRE-----YQLHGAASALLIHQLLFR 163  
*P.aeruginosa* 2192 |ZP\_00971291.1| NG-----PINQPYRFKYVKSRE-----YQLHGAASALLIHQLLFR 163  
*A.vinelandii* AvOP |ZP\_00419624.1| HG-----PITRPFYRFYVKGRE-----YPLHGAASALLYAQILDR 192  
*P.fluorescens* Pf-5 |YP\_261833.1| HG-----PIAKPYRFKYIKGRE-----YQLHGAATALIYSQILAP 192  
*P.s.phaseolicola* |CAI36140.1| HG-----PLDQPYRFKYVKGRD-----YRLHGAASLLIYSNVIPA 132  
*P.syringae* BR2R |AAL99262.1| HG-----PLDQPYRFKYVKGRD-----YRLHGAASLLIYSNVIPA 194  
*P.s.tomato* DC3000 |NP\_790676.1| HG-----PLDQPYRFKYVKGRD-----YRLHGAASLLIYANVIPA 194  
*P.s.syringae* B728a |YP\_233835.1| HG-----PLDQPYRFKYVKGRD-----YRLHGAASLLIYSHVIPA 190  
*P.putida* F1 |ZP\_00898124.1| HG-----PLNQPYRFYVPDRD-----YQLHGAAGLLYTQILTP 217  
*P.fluorescens* PfO-1 |YP\_348763.1| QG-----SLDQPYRFYIKGRD-----YHLHGAAGLLYTQILDR 193  
*H.influenzae* R2866 |ZP\_00157643.1| LG-----IPTLPYKFKYIKGRD-----YELHPVMGSSYLASYLIPK 175  
*H.influenzae* pICEhin1056 |CAF29070.1| LG-----IPTLPYKFKYIKGRD-----YELHPVMGSSYLASYLIPK 207  
*H.influenzae* 86-028NP |YP\_247808.1| LG-----VPTQPYKFKYIKGRD-----YDLHPVMGSFLANYLIPK 211  
*H.ducreyi* 35000HP |NP\_873395.1| HG-----VPPQPYKFKYIKGRD-----YEFHPVLGSLYAGFLIPQ 203  
*H.somnus* 129PT |YP\_718205.1| HG-----IPTLPYKFKYIKQRD-----YELHPVLGGFIANQLIAK 204  
*M.aquaeolei* VT8 |ZP\_00817690.1| YGNI-----PPGAAAYRFRFRKIENTRLAKTLHEKSAMSLPRLLSK 223  
*A.a.citrulli* AAC00-1 |ZP\_01407598.1| GGSLVQIAGR--PAAEYLVDFAFKSQRD---YSAHGRLAQLLPRIAPE 268  
*Azoarcus* EbN1 |YP\_157225.1| AGDMVAAG-----AAEYEVRFAPKAERD---YGAHRRLLPLVLA PRIVPA 241  
*E.coli* pAPEC-O1-R |ABF67837.1| SQS--LLDWARENDVVEYEHWRKR-----IHNQHNIWSSVFLERILNP 254  
*S.marcescens* R478 |NP\_941280.1| SQS--LLDWARENDVVEYEHWRKR-----IHNQHNIWSSVFLERILNP 254  
*S.typhi* R27 |NP\_058333.1| SQS--LLDWARENNVVEYEHWRKR-----IHNQHNIWSSVFLERILD 252  
*S.e.e.typhi* CT18 pHCM1 |NP\_569454.1| SQS--LLDWARENNVVEYEHWRKR-----IHNQHNIWSSVFLERILD 252  
*N.gonorrhoeae* MS11 |AAW83058.1| TGSMAE-----SGKLYRVEFPDAKS----AYSTHAEIAWTFQALVPS 229  
*P.resinovorans* pCAR1 |NP\_758664.1| QETLHDWS--VRNKLTRYFLHWNSN-----RHGNHVQVSVQA TRIIPP 286  
*P.vulgaris* UR-75 pRts1 |NP\_640161.1| VHCLH--EWAETEKIERYFIFWRS-----DRHERHHNTSLTKMTDIVPK 223  
**Consensus** .....PLRQPYRFYRKDRE.....YRLHGAASGLLYRQLLDR

\* \* \*

c . . . s

**HD domain consensus**

*P.rettgeri* |AAM08003.1|  
*V.cholerae* MO10 |EAZ47260.1|  
*V.cholerae* |ABA87024.1|  
*Shewanella* W3-18-1 |YP\_962502.1|  
*Y.p.orientalis* IP275 |ZP\_01175343.1|  
*X.c.vesicatoria* 85-10 |YP\_364087.1|  
*Acidovorax* JS42 |ZP\_01384863.1|  
*X.fastidiosa* 9a5c |NP\_299042.1|  
*Acidovorax* JS42 |ZP\_01382702.1|  
*P.aeruginosa* PACS2 |ZP\_01366009.1|  
*R.metallidurans* CH34 |YP\_584510.1|  
*P.aeruginosa* 2192 |ZP\_00974810.1|  
*P.aeruginosa* str.C |AAN62129.1|  
*B.xenovorans* LB400 |YP\_559832.1|  
*X.c.campestris*ATCC33913|NP\_638468.1|  
*N.eutropha* C91 |ABI58357.1|  
*X.c.campestris* 8004 |YP\_243101.1|  
*P.aeruginosa* SG17M |AAN62266.1|  
*R.gelatinosus* PM1 |ZP\_00242313.1|  
*Acidovorax* JS42 |ZP\_01384808.1|  
*Azoarcus* EbN1 |YP\_158431.1|  
*Azoarcus* EbN1 |YP\_158356.1|  
*A.a.citrulli* AAC00-1 |ZP\_01405034.1|  
*X.a.citri* 306 |NP\_642513.1|  
*P.aeruginosa* PA14 |AAP84130.1|  
*P.aeruginosa* 6077 |ABD94612.1|  
*P.aeruginosa* C pKLC102 |AAP22591.1|  
*P.aeruginosa* C |AAP94681.1|  
*P.aeruginosa* 2192 |ZP\_00971291.1|  
*A.vinelandii* AvOP |ZP\_00419624.1|  
*P.fluorescens* Pf-5 |YP\_261833.1|  
*P.s.phaseolicola* |CAI36140.1|  
*P.syringae* BR2R |AAL99262.1|  
*P.s.tomato* DC3000 |NP\_790676.1|  
*P.s.syringae* B728a |YP\_233835.1|  
*P.putida* F1 |ZP\_00898124.1|  
*P.fluorescens* PfO-1 |YP\_348763.1|  
*H.influenzae* R2866 |ZP\_00157643.1|  
*H.influenzae* pICEhin1056|CAF29070.1|  
*H.influenzae* 86-028NP |YP\_247808.1|  
*H.ducreyi* 35000HP |NP\_873395.1|  
*H.somnus* 129PT |YP\_718205.1|  
*M.aquaeolei* VT8 |ZP\_00817690.1|  
*A.a.citrulli* AAC00-1 |ZP\_01407598.1|  
*Azoarcus* EbN1 |YP\_157225.1|  
*E.coli* pAPEC-O1-R |ABF67837.1|  
*S.marcescens* R478 |NP\_941280.1|  
*S.typhi* R27 |NP\_058333.1|  
*S.e.e.typhi* CT18 pHCM1 |NP\_569454.1|  
*N.gonorrhoeae* MS11 |AAW83058.1|  
*P.resinovorans* pCAR1 |NP\_758664.1|  
*P.vulgaris* UR-75 pRts1 |NP\_640161.1|

**Consensus**

**HD domain consensus**

ELLAWLWLTQPG-PEILQAMLEA-----IGNTDLEHVLS----KLVI 242  
ELLAWLWLTQPG-PEILQAMLEA-----IGNTDPEHVLS----KLVI 242  
ELLAWLWLTQPG-PEILQAMLEA-----IGNTDPEHVLS----KLVI 242  
ELLAWLWLTQPG-PEILQAMLEA-----IGNTDPEHVLS----KLVI 242  
ETREFLSKSG-PSIMEAMLEA-----ISGTSVNQPVT----KLML 254  
DLLDWLSGY--PSLWAPPLYV-----LAGQYEHAGVVG----ELVV 232  
DLLDWLSGY--PSLWAPPLYV-----LAGQYEHAGVVG----ELVV 232  
DLLDWLSGY--PSLWAPPLYV-----LAGQYEHAGVVG----ELVV 232  
DALDWLSGY--PDLWGPLYV-----LAGQYEHAGVVG----ELVV 232  
HVLDWLSGY--PALWAPPLYV-----LAGQYEHAGVVG----ELVV 232  
QLLDWLSGY--RDLWGPLYV-----LAGQYEHAGVVG----ELVV 282  
QLLDWLSGY--RDLWGPLYV-----LAGQYEHAGVVG----ELVV 204  
QLLDWLSGY--RDLWGPLYV-----LAGQYEHAGVVG----ELVV 232  
QLLDWLSGY--PALWGPLYV-----LAGQYEHAGVVG----ELVV 232  
AALDWLSGY--PALWSQLLYV-----LSGQYEHADMLG----ELVV 231  
DILDWLNFG--PSLWSALLYV-----LAGQYEHAGVVG----ELVI 232  
FILDWLSGF--PSLWAAALYI-----MAGQYEHAGVVG----ELVI 232  
RILDWLSRY--PPLWSALLYV-----LAGQYEHAGTGLG----ELVI 232  
DIFDWLSGY--PDLWAAALYV-----LAGQYEHAGTGLG----ELVV 204  
DIFDWLSGY--PDLWAAALYV-----LAGQYEHAGTGLG----ELVV 232  
GIFDWLSGY--PDVWAAALYV-----LAGQYEHAGTGLG----ELVV 231  
GIFDWLSGY--PDLWSALLYV-----LAGQYEHAGTGLG----ELVA 232  
AILDWLSGY--PDLWRPLYV-----LAGQHEHAGVVG----ELVV 239  
GILDWLSGF--PDLWSPLLFV-----LAGQNEHAGVVG----ELVV 240  
TALDWLSRF--PELWAQLIYL-----FAGQYEHAGILG----EIIIV 229  
TALDWLSRF--PELWAQLIYL-----FAGQYEHAGILG----EIIIV 233  
TALDWLSRF--PELWAQLIYL-----FAGQYEHAGILG----EIIIV 229  
TALDWLSRF--PELWAQLIYL-----FAGQYEHAGILG----EIIIV 198  
TALDWLSRF--PELWAQLIYL-----FAGQYEHAGILG----EIIIV 198  
NILDWLSGF--PEPWRLIYA-----LAGQYEHAGILG----EIVV 227  
EILDWLCGF--PELWTELIYL-----VAGQFENAGILG----EIVI 227  
KALDWLSGF--PELWSQLVFA-----FAGQYEHADILG----EIVS 167  
KALDWLSGF--PELWSQLVFT-----FAGQYEHADILG----EIVS 229  
KALDWLSGF--PELWTQLVFA-----FAGQYEHADILG----EIVS 229  
KALDWLSGF--PELWSQLVFAFAFA----FAGQYEHADILG----EIVS 229  
TLLDWLSY--PELWRQLLSL-----LADHYEQAGTGLG----ELVL 252  
PILDWLSGF--PPLWASLLYV-----LAGQYERAGVVG----ELVM 228  
EAFEWLAGY--PEAFASLMYA-----MANHKDKSGLLS----EIVQ 210  
EAFEWLAGY--PEAFASLMYA-----MANHKDKSGLLS----EIVQ 242  
EAFAWLAEY--PEAFSALMYA-----MADHKDKAGLLS----EIVQ 246  
EAFDWLTQY--PEVFS----- 217  
ETFDWLATY--PEVFSALMYA-----MAGHYDKANVLA----EIVQ 239  
EAATWLFKD--LELISQLFST-----ISHSTFGQVIA----EIVR 258  
SALQFLAYT--PAALDALEKY-----LSGQ-DKDSLVA----QIVK 302  
TALAFLARE--PSVMLELQAV-----WSDG-DATSVLT----EIVR 275  
VCLAFLDRVKNKERVYSKMITA-----LNVYTDGNDFLS----KCVR 291  
VCLAFLDRVKNKERVYSKMITA-----LNVYTDGNDFLS----KCVR 291  
VCMSFLDRVKKERVYAKMVTA-----LNVYNDGNDFLS----KCVR 289  
VCMSFLDRVKKERVYAKMVTA-----LNVYNDGNDFLS----KCVR 289  
HVRQWLATTD--PNLMITLRNY-----LSGKKDGSPLE----QLIK 264  
AVQAWLIEGG--HDIYEALDA-----ISGSGSSPLT----ELVK 320  
SLLAFLMQEG--NDIYNELTEALAGSNSFRAVTSRNETGTVFKNKIHKIVA 272

..LDWL.....ELVV

:\*

.h

..h.

*P.rettgeri* |AAM08003.1|  
*V.cholerae* MO10 |EAZ47260.1|  
*V.cholerae* |ABA87024.1|  
*Shewanella* W3-18-1 |YP\_962502.1|  
*Y.p.orientalis* IP275 |ZP\_01175343.1|  
*X.c.vesicatoria* 85-10 |YP\_364087.1|  
*Acidovorax* JS42 |ZP\_01384863.1|  
*X.fastidiosa* 9a5c |NP\_299042.1|  
*Acidovorax* JS42 |ZP\_01382702.1|  
*P.aeruginosa* PACS2 |ZP\_01366009.1|  
*R.metallidurans* CH34 |YP\_584510.1|  
*P.aeruginosa* 2192 |ZP\_00974810.1|  
*P.aeruginosa* str.C |AAN62129.1|  
*B.xenovorans* LB400 |YP\_559832.1|  
*X.c.campestris*ATCC33913|NP\_638468.1|  
*N.eutropha* C91 |ABI58357.1|  
*X.c.campestris* 8004 |YP\_243101.1|  
*P.aeruginosa* SG17M |AAN62266.1|  
*R.gelatinosus* PM1 |ZP\_00242313.1|  
*Acidovorax* JS42 |ZP\_01384808.1|  
*Azoarcus* EbN1 |YP\_158431.1|  
*Azoarcus* EbN1 |YP\_158356.1|  
*A.a.citrulli* AAC00-1 |ZP\_01405034.1|  
*X.a.citri*\_306\_NP\_642513.1  
*P.aeruginosa* PA14 |AAP84130.1|  
*P.aeruginosa* 6077 |ABD94612.1|  
*P.aeruginosa* C pKLC102 |AAP22591.1|  
*P.aeruginosa* C |AAP94681.1|  
*P.aeruginosa* 2192 |ZP\_00971291.1|  
*A.vinelandii* AvOP |ZP\_00419624.1|  
*P.fluorescens* Pf-5 |YP\_261833.1|  
*P.s.phaseolicola* |CAI36140.1|  
*P.syringae* BR2R |AAL99262.1|  
*P.s.tomato* DC3000 |NP\_790676.1|  
*P.s.syringae* B728a |YP\_233835.1|  
*P.putida* F1 |ZP\_00898124.1|  
*P.fluorescens* PfO-1 |YP\_348763.1|  
*H.influenzae* R2866 |ZP\_00157643.1|  
*H.influenzae* pICEhin1056|CAF29070.1|  
*H.influenzae* 86-028NP |YP\_247808.1|  
*H.ducreyi* 35000HP |NP\_873395.1|  
*H.somnus* 129PT |YP\_718205.1|  
*M.aquaeolei* VT8 |ZP\_00817690.1|  
*A.a.citrulli* AAC00-1 |ZP\_01407598.1|  
*Azoarcus* EbN1 |YP\_157225.1|  
*E.coli* pAPEC-O1-R |ABF67837.1|  
*S.marcescens* R478 |NP\_941280.1|  
*S.typhi* R27 |NP\_058333.1|  
*S.e.e.typhi* CT18 pHCM1 |NP\_569454.1|  
*N.gonorrhoeae* MS11 |AAW83058.1|  
*P.resinovorans* pCAR1 |NP\_758664.1|  
*P.vulgaris* UR-75 pRts1 |NP\_640161.1|

**Consensus**

**HD domain consensus**

EADQTSVQRDLKAQRISVDDNALG-VPVERYLLDAMRRLASS-QWLVNQ 290  
EADQTSVQRDLKAQRISVDDNALG-VPVERYLLDAMRRLASS-QWLVNQ 290  
EADQTSVQRDLKAQRISVDDNALG-VPVERYLLDAMRRLASS-QWLVNQ 290  
EADQTSVQRDLKAQRISVDDNALG-VPVERYLLDAMRRLASS-QWLVNQ 290  
RADQESVSRDLRQSRDLVDEFSYG-VPVERYVFDAIRRLVKTG-KWKVNE 302  
QADRASVAQELGGDP-ARAMAAPK-HSLQRKLVNGLRYLLKE--ELKLNQ 278  
QADRASVAQELGGDP-ARAMAAPK-HSLQRKLVNGLRYLLKE--ELKLNQ 278  
QADRASVAQELGGDP-ARAMAAPK-HSLQRKLVNGLRYLLKE--ELKLNQ 278  
QADRASVAQELGGDP-ARAMAAPK-HALQRKLLDGLRYLLKE--QLKLNQ 278  
QADRASVAQELGGDP-ARVMAAPK-HALQRKLLDGLRYLLKE--ELKLNQ 278  
QADRASVAQELGGDP-ARAMAAPK-HALQRKLLDGLRYLLKE--ELKLNQ 328  
QADRASVAQELGGDP-ARAMAAPK-HALQRKLLDGLRYLLKE--ELKLNQ 250  
QADRASVAQELGGDP-ARAMAAPK-HALQRKLLDGLRYLLKE--ELKLNQ 278  
QADRASVAQELGGDP-ARAMAAPK-HALQRKLLDGLRYLLKE--ELKLNQ 278  
QADRASVAQELGGDP-ARAMAAPK-HALQRKLLDGLRYLLKE--ELKLNQ 278  
QADRASVAQELGGDP-AKVMAAPK-HALQRKLEGLRYLLKE--QLKLNQ 277  
QADRASVAQALGGDP-ARAMAAPK-HALQRKLEGLRYLLKE--ELKLNQ 278  
KADRASVAQELGGDP-AKAMAAPK-HALQRKLLDGLRYLLKE--ELKLNQ 278  
QADRASVAQALGGDP-ARAMAAPK-HALQRKLEGLRYLLKE--ELKLNQ 278  
QADQASVAQELGGDP-SKALAAPK-HALQRKLLDGLRYLLKE--EFKLNQ 250  
QADQASVAQELGGDP-SKALAAPK-HALQRKLLDGLRYLLKE--EFKLNQ 278  
QADRASVAQELGGDP-GKALAAPR-HALQRKLLDGLRFLLE--EFKLNQ 277  
QADQASVAQALGGDP-AKALAAPR-HALQRKLLDGLRYLLKE--EFKLNQ 278  
QADQASVAQAMGGDP-ARALAAPR-HALQRKLLDGLRFLLE--QLQLNQ 285  
QADQASVAQSLGGDP-AKALTAPR-HALQRKLEGLRYLLRE--QLQINQ 286  
KADQASVAQELGGNP-DRALAAPK-QSLQRQLADGLRFLVKD--KFKLNQ 275  
KADQASVAQELGGNP-DRALAAPK-QSLQRQLADGLRFLVKD--KFKLNQ 279  
KADQASVAQELGGNP-DRALAAPK-QSLQRQLADGLRFLVKD--KFKLNQ 275  
KADQASVAQELGGNP-DRALAAPK-QSLQRQLADGLRFLVKD--KFKLNQ 244  
KADQASVAQELGGNP-DRALAAPK-QSLQRQLADGLRFLVKD--KFKLNQ 244  
KADQASVAQALGGNP-ERALAAPK-QSLQRQLAEGRLYLVR--KFKLNQ 273  
KADSASVAQELGGNP-DRAMAAPK-QSLQRQLVECLRYLVR--KFKLNH 273  
QADQASVAQELGGNP-GRAMSAPK-QSIQRQLAEGRLYLVR--KFKLNQ 213  
QADQASVAQELGGNP-GRAMSAPK-QSIQRQLAEGRLRMLVR--KFKLNQ 275  
QADQASVAQELGGNP-GRAMSAPK-QSIQRQLAEGRLRMLISE--KFKLNQ 275  
QADQASVAQELGGNP-GKAMSAPK-QSIQRQLAEGRLRMLVR--KFKLNQ 275  
QADRVSSTAQNIGANP-TKALQAPK-HSLQHLLMGLRHLVKN--EFKLNQ 298  
QADRVSSTAQNIGGNP-SKALQAPI-HSLQHLLISGLRHLVQH--ELKLNQ 274  
KADQNSVTLALGGDV-SKLVQKPG-TSFTKQIVMALRYLLEH--KFKINT 256  
KADQNSVTLALGGDV-SKLVQKPG-TSFAKQIVMALRYLLEH--KFKINT 288  
KADQNSVTLALGGDV-SKLTQKPI-TSFAKQIVMALRHLLQH--KFKINT 292  
-----  
KADQNSVALALGGDI-TKLVQKPV-ISFAKQLILALRYLISQ--KFKISS 285  
AADGASVSKNVGANTGKKADHTNT-IPLYEKLVSLRKLVDNG-DLKRNK 306  
RADKLSTQRALLSGHKARFSTAKA-VPLIDLLMQAMAAMLRSGSTLPLNR 351  
LADRRSAAASNQQGPRSQFSAATT-VPLIEQLMAAMRLLRQG-GLPLNR 323  
TADFYSTGTDLNVLR-DPIMGLRS-NDAAARAISTIKHNFTS---ININN 336  
TADFYSTGTDLNVLR-DPIMGLRS-NDAAARAISTIKHNFTS---ININN 336  
TSDYYSTGTDLNVLR-DPIMGLRS-NDAAARAIGTIKHNFST---ININN 334  
TSDYYSTGTDLNVLR-DPIMGLRS-NDAAARAIGTIKHNFST---ININN 334  
NADMTSVSRDLRSGSRQRFSTAKR-KPFIETIMETLKEMLSDR-GVHFSI 312  
WADSASTKRDLNRSGNNGGNATG-VPVPRLVSDAMLRLLSDG-TWKINT 368  
HADSRSVKQDLQRYSGDAVRASQTGVPVIARIVDAMRLLIKKE-EWKPENQ 321  
QADQAS.....

\* \*

.hd.h.



**Fig. S1.** CLUSTAL W alignment of the first three-hundred amino acids of proteins in the *Ng* Tral family. The different font colors represent proteins with similar predicted amphipathic  $\alpha$  helices at the N-terminus proximal region: bold, green, blue, and magenta. Underlined (red) in *Ng* Tral is the unique N-terminal hydrophobic region, where the black background, white font highlights the N-terminal amphipathic  $\alpha$  helix. *Azoarcus* sp. EbN1 (red font) contains an N-terminal transmembrane domain besides the N-terminus proximal amphipathic  $\alpha$  helix. The predicted amphipathic  $\alpha$  helices of proteins with two at the N-terminus proximal region are highlighted in yellow. It is not clear if *H. somnus* contains an amphipathic  $\alpha$  helix since a charged residue (His) is present on the hydrophobic side of the predicted  $\alpha$  helix (orange background, black font). Underlined in black is motif I and II of classical relaxases, present only in *E. coli* pAPEC-01-R, *S. marcescens* R478, *S. typhi* R27, and *S. typhi* CT18 pHCM1. Tyr<sup>93</sup> and Tyr<sup>201</sup> (in *N. gonorrhoeae*) are conserved. The His-rich motif, reported as motif III in R27 Tral, is a hallmark of this family of sequence h(Q/H)xhPASExHHHx<sub>3</sub>GG(L/M)h, where h is a hydrophobic residue and x is any residue. The consensus sequence of the fifty-four proteins is shown. The consensus amino acid sequence for the HD domain is also shown: (b) big, (s) small, (h) hydrophobic, and (c) charged. The capital letters represent the invariant amino acids.
